# Supplementary material
Source: PubMed Central journal article supplement (PMC3057083)
Supplement: NIHMS272964-supplement-Supp1.pdf [file NIHMS272964-supplement-Supp1.pdf]

**SUPPLEMENTAL MATERIAL: Relations of Insulin Resistance and Glycemic Abnormalities to Cardiovascular Magnetic Resonance Measures of Cardiac Structure and Function: the Framingham Heart Study**

**I. Relations of HOMA-IR (as a continuous variable) to CMR measures**

**II. Relations of 2-hr insulin to CMR measures**

**III. Relations of 2-hr glucose to CMR measures**

**IV. Relations of HOMA-IR to LVM and LVEDV separately**

**V. Relations of glycemia categories to LVM and LVEDV separately**

**Supplementary Table 1: Relations of HOMA-IR to CMR measures**

|                                                | <b>Model</b> | <b>Beta estimate (SE)*</b> | <b>p-value</b> |
|------------------------------------------------|--------------|----------------------------|----------------|
| <b>MEN</b>                                     |              |                            |                |
| <b>LAD, mm</b>                                 | Age-adjusted | 1.03 (0.31)                | 0.0008         |
|                                                | MV-adjusted  | -0.97 (0.32)               | 0.002          |
| <b>LVM/ht<sup>2.7</sup>, g/m<sup>2.7</sup></b> | Age-adjusted | 1.76 (0.33)                | <0.0001        |
|                                                | MV-adjusted  | -0.31 (0.34)               | 0.36           |
| <b>LVM/LVEDV, gm/ml</b>                        | Age-adjusted | 0.07 (0.01)                | <0.0001        |
|                                                | MV-adjusted  | 0.05 (0.01)                | <0.0001        |
| <b>RWT</b>                                     | Age-adjusted | 0.02 (0.003)               | <0.0001        |
|                                                | MV-adjusted  | 0.01 (0.003)               | 0.004          |
| <b>CO, L/min</b>                               | Age-adjusted | 0.24 (0.07)                | 0.001          |
|                                                | MV-adjusted  | -0.07 (0.08)               | 0.35           |
| <b>LVEF (%)</b>                                | Age-adjusted | 1.31 (0.41)                | 0.002          |
|                                                | MV-adjusted  | 1.01 (0.47)                | 0.03           |
| <b>WOMEN</b>                                   |              |                            |                |
| <b>LAD, mm</b>                                 | Age-adjusted | 1.66 (0.23)                | <0.0001        |
|                                                | MV-adjusted  | -0.32 (0.23)               | 0.18           |
| <b>LVM/ht<sup>2.7</sup>, g/m<sup>2.7</sup></b> | Age-adjusted | 1.48 (0.23)                | <0.0001        |
|                                                | MV-adjusted  | -0.55 (0.23)               | 0.01           |
| <b>LVM/LVEDV, gm/ml</b>                        | Age-adjusted | 0.03 (0.01)                | <0.0001        |
|                                                | MV-adjusted  | 0.01 (0.01)                | 0.03           |
| <b>RWT</b>                                     | Age-adjusted | 0.007 (0.003)              | 0.007          |
|                                                | MV-adjusted  | 0.002 (0.003)              | 0.44           |
| <b>CO, L/min</b>                               | Age-adjusted | 0.32 (0.05)                | <0.0001        |
|                                                | MV-adjusted  | -0.03 (0.05)               | 0.56           |
| <b>LVEF (%)</b>                                | Age-adjusted | 0.79 (0.29)                | 0.007          |
|                                                | MV-adjusted  | 0.58 (0.34)                | 0.09           |

\*Cells present beta coefficient estimates (standard error) for change in CMR measures (in their units) per standard deviation change in HOMA-IR.

MV-adjusted = multivariable-adjusted; CO = cardiac output; LAD = left atrial dimension; LVEF = left ventricular ejection fraction; LVEDV = left ventricular end-diastolic volume; LVM = left ventricular mass; RWT = relative wall thickness

MV model adjusted for age, body mass index, systolic blood pressure, cardioactive drug therapy and smoking status.

**Supplementary Table 2: Adjusted CMR measures across 2-hr insulin quartiles**

| <b>Men</b>                                     |               |                            |                            |                            |                            |                 |
|------------------------------------------------|---------------|----------------------------|----------------------------|----------------------------|----------------------------|-----------------|
|                                                | <b>Models</b> | <b>Quartile 1 (n = 66)</b> | <b>Quartile 2 (n = 64)</b> | <b>Quartile 3 (n = 63)</b> | <b>Quartile 4 (n = 62)</b> | <b>p-value*</b> |
| <b>LAD, mm</b>                                 | Age-adjusted  | 31                         | 32                         | 32                         | 32                         | 0.57            |
|                                                | MV-adjusted   | 32                         | 32                         | 32                         | 30                         | 0.65            |
| <b>LVM/ht<sup>2.7</sup>, g/m<sup>2.7</sup></b> | Age-adjusted  | 27.6                       | 27.9                       | 27.0                       | 29.1                       | 0.22            |
|                                                | MV-adjusted   | 29.0                       | 28.2                       | 27.0                       | 27.2                       | 0.44            |
| <b>LVM/LVEDV, gm/ml</b>                        | Age-adjusted  | 0.86                       | 0.87                       | 0.87                       | 0.97                       | 0.0003          |
|                                                | MV-adjusted   | 0.88                       | 0.88                       | 0.87                       | 0.95                       | 0.03            |
| <b>RWT</b>                                     | Age-adjusted  | 0.27                       | 0.28                       | 0.28                       | 0.30                       | 0.002           |
|                                                | MV-adjusted   | 0.28                       | 0.28                       | 0.28                       | 0.29                       | 0.30            |
| <b>CO, L/min</b>                               | Age-adjusted  | 5.8                        | 5.8                        | 5.8                        | 6.0                        | 0.28            |
|                                                | MV-adjusted   | 6.0                        | 5.8                        | 5.8                        | 5.7                        | 0.08            |
| <b>LVEF (%)</b>                                | Age-adjusted  | 66                         | 66                         | 66                         | 69                         | 0.04            |
|                                                | MV-adjusted   | 66                         | 66                         | 66                         | 68                         | 0.64            |
| <b>Women</b>                                   |               |                            |                            |                            |                            |                 |
|                                                | <b>Models</b> | <b>Quartile 1 (n = 72)</b> | <b>Quartile 2 (n = 74)</b> | <b>Quartile 3 (n = 74)</b> | <b>Quartile 4 (n = 69)</b> | <b>p-value*</b> |
| <b>LAD, mm</b>                                 | Age-adjusted  | 27                         | 28                         | 28                         | 30                         | 0.0005          |
|                                                | MV-adjusted   | 28                         | 29                         | 28                         | 28                         | 0.13            |
| <b>LVM/ht<sup>2.7</sup>, g/m<sup>2.7</sup></b> | Age-adjusted  | 22.3                       | 22.9                       | 23.6                       | 25.7                       | <0.0001         |
|                                                | MV-adjusted   | 23.9                       | 23.8                       | 23.2                       | 23.4                       | 0.56            |
| <b>LVM/LVEDV, gm/ml</b>                        | Age-adjusted  | 0.75                       | 0.79                       | 0.81                       | 0.83                       | <0.0001         |
|                                                | MV-adjusted   | 0.77                       | 0.80                       | 0.80                       | 0.81                       | 0.27            |
| <b>RWT</b>                                     | Age-adjusted  | 0.24                       | 0.26                       | 0.26                       | 0.26                       | 0.08            |
|                                                | MV-adjusted   | 0.25                       | 0.26                       | 0.26                       | 0.25                       | 0.77            |
| <b>CO, L/min</b>                               | Age-adjusted  | 4.7                        | 4.7                        | 4.9                        | 5.1                        | 0.008           |
|                                                | MV-adjusted   | 4.9                        | 4.9                        | 4.9                        | 4.6                        | 0.80            |
| <b>LVEF (%)</b>                                | Age-adjusted  | 67                         | 69                         | 71                         | 71                         | <0.0001         |
|                                                | MV-adjusted   | 67                         | 69                         | 71                         | 71                         | 0.56            |

Cells present mean values of cardiac measures; \*p-value for trend.

MV-adjusted = multivariable-adjusted; CO = cardiac output; LAD = left atrial dimension; LVEF = left ventricular ejection fraction; LVEDV = left ventricular end-diastolic volume; LVM = left ventricular mass; RWT = relative wall thickness

MV model adjusted for age, body mass index, systolic blood pressure, cardioactive drug therapy and smoking status.

**Supplementary Table 3: Adjusted CMR measures across 2-hr glucose quartiles**

| <b>Men</b>                                     |               |                            |                            |                            |                            |                 |
|------------------------------------------------|---------------|----------------------------|----------------------------|----------------------------|----------------------------|-----------------|
|                                                | <b>Models</b> | <b>Quartile 1 (n = 67)</b> | <b>Quartile 2 (n = 67)</b> | <b>Quartile 3 (n = 63)</b> | <b>Quartile 4 (n = 58)</b> | <b>p-value*</b> |
| <b>LAD, mm</b>                                 | Age-adjusted  | 31                         | 32                         | 32                         | 32                         | 0.13            |
|                                                | MV-adjusted   | 31                         | 32                         | 32                         | 31                         | 0.55            |
| <b>LVM/ht<sup>2.7</sup>, g/m<sup>2.7</sup></b> | Age-adjusted  | 26.9                       | 27.9                       | 27.8                       | 28.9                       | 0.07            |
|                                                | MV-adjusted   | 28.2                       | 28.1                       | 27.4                       | 27.7                       | 0.79            |
| <b>LVM/LVEDV, gm/ml</b>                        | Age-adjusted  | 0.87                       | 0.88                       | 0.88                       | 0.94                       | 0.048           |
|                                                | MV-adjusted   | 0.89                       | 0.89                       | 0.87                       | 0.91                       | 0.58            |
| <b>RWT</b>                                     | Age-adjusted  | 0.27                       | 0.28                       | 0.28                       | 0.30                       | 0.02            |
|                                                | MV-adjusted   | 0.28                       | 0.28                       | 0.28                       | 0.29                       | 0.39            |
| <b>CO, L/min</b>                               | Age-adjusted  | 5.5                        | 5.8                        | 6.0                        | 6.1                        | 0.002           |
|                                                | MV-adjusted   | 5.7                        | 5.8                        | 6.0                        | 6.0                        | 0.28            |
| <b>LVEF (%)</b>                                | Age-adjusted  | 66                         | 65                         | 67                         | 68                         | 0.20            |
|                                                | MV-adjusted   | 67                         | 65                         | 66                         | 67                         | 0.38            |
| <b>Women</b>                                   |               |                            |                            |                            |                            |                 |
|                                                | <b>Models</b> | <b>Quartile 1 (n = 73)</b> | <b>Quartile 2 (n = 77)</b> | <b>Quartile 3 (n = 75)</b> | <b>Quartile 4 (n = 65)</b> | <b>p-value*</b> |
| <b>LAD, mm</b>                                 | Age-adjusted  | 27                         | 28                         | 30                         | 30                         | <0.0001         |
|                                                | MV-adjusted   | 28                         | 28                         | 29                         | 29                         | 0.32            |
| <b>LVM/ht<sup>2.7</sup>, g/m<sup>2.7</sup></b> | Age-adjusted  | 21.3                       | 23.0                       | 25.2                       | 25.0                       | <0.0001         |
|                                                | MV-adjusted   | 23.2                       | 23.5                       | 24.1                       | 23.5                       | 0.60            |
| <b>LVM/LVEDV, gm/ml</b>                        | Age-adjusted  | 0.75                       | 0.79                       | 0.82                       | 0.82                       | 0.0003          |
|                                                | MV-adjusted   | 0.78                       | 0.80                       | 0.80                       | 0.80                       | 0.53            |
| <b>RWT</b>                                     | Age-adjusted  | 0.24                       | 0.27                       | 0.26                       | 0.26                       | 0.13            |
|                                                | MV-adjusted   | 0.25                       | 0.27                       | 0.26                       | 0.25                       | 0.03            |
| <b>CO, L/min</b>                               | Age-adjusted  | 4.5                        | 4.8                        | 5.0                        | 5.0                        | 0.0007          |
|                                                | MV-adjusted   | 4.8                        | 4.9                        | 4.8                        | 4.8                        | 0.80            |
| <b>LVEF (%)</b>                                | Age-adjusted  | 69                         | 69                         | 70                         | 70                         | 0.20            |
|                                                | MV-adjusted   | 70                         | 69                         | 70                         | 69                         | 0.86            |

Cells present mean values of cardiac measures; \*p-value for trend.

MV-adjusted = multivariable-adjusted; CO = cardiac output; LAD = left atrial dimension; LVEF = left ventricular ejection fraction; LVEDV = left ventricular end-diastolic volume; LVM = left ventricular mass; RWT = relative wall thickness

MV model adjusted for age, body mass index, systolic blood pressure, cardioactive drug therapy and smoking status.

**Supplementary Table 4: Adjusted LVM and LVEDV measures across HOMA-IR quartiles**

| <b>Men</b>       |               |                                                |                                                |                                                |                                                 |                 |
|------------------|---------------|------------------------------------------------|------------------------------------------------|------------------------------------------------|-------------------------------------------------|-----------------|
|                  | <b>Models</b> | <b>Quartile 1<br/>0.41-2.43†<br/>(n = 176)</b> | <b>Quartile 2<br/>2.44-3.55†<br/>(n = 174)</b> | <b>Quartile 3<br/>3.56-5.64†<br/>(n = 168)</b> | <b>Quartile 4<br/>5.66-57.31†<br/>(n = 132)</b> | <b>p-value*</b> |
| <b>LVM, gm</b>   | Age-adjusted  | 124                                            | 125                                            | 126                                            | 134                                             | 0.005           |
|                  | MV-adjusted   | 131                                            | 127                                            | 124                                            | 126                                             | 0.04            |
| <b>LVEDV, ml</b> | Age-adjusted  | 149                                            | 143                                            | 144                                            | 141                                             | 0.07            |
|                  | MV-adjusted   | 153                                            | 144                                            | 142                                            | 135                                             | <0.0001         |
| <b>Women</b>     |               |                                                |                                                |                                                |                                                 |                 |
|                  | <b>Models</b> | <b>Quartile 1<br/>0.23-2.03†<br/>(n = 216)</b> | <b>Quartile 2<br/>2.04-2.84†<br/>(n = 213)</b> | <b>Quartile 3<br/>2.85-4.25†<br/>(n = 208)</b> | <b>Quartile 4<br/>4.26-43.01†<br/>(n = 175)</b> | <b>p-value*</b> |
| <b>LVM, gm</b>   | Age-adjusted  | 82                                             | 82                                             | 86                                             | 93                                              | <0.0001         |
|                  | MV-adjusted   | 87                                             | 84                                             | 85                                             | 85                                              | 0.20            |
| <b>LVEDV, ml</b> | Age-adjusted  | 108                                            | 106                                            | 108                                            | 113                                             | 0.002           |
|                  | MV-adjusted   | 112                                            | 108                                            | 108                                            | 105                                             | 0.008           |

Cells present adjusted mean values of cardiac measures; \*p-value for trend; †range of HOMA-IR for the respective quartile.

MV-adjusted = multivariable-adjusted; LVM = left ventricular mass; LVEDV = left ventricular end-diastolic volume.

MV model adjusted for age, body mass index, systolic blood pressure, cardioactive drug therapy and smoking status.

**Supplementary Table 5: Adjusted LVM and LVEDV measures across glycemia categories**

| <b>Men</b>   |               |                             |                                       |                                       |                              |                 |
|--------------|---------------|-----------------------------|---------------------------------------|---------------------------------------|------------------------------|-----------------|
|              | <b>Models</b> | <b>Normal<br/>(n = 330)</b> | <b>High<br/>FPG/FPI<br/>(n = 235)</b> | <b>Pre-<br/>Diabetes<br/>(n = 92)</b> | <b>Diabetes<br/>(n = 68)</b> | <b>p-value*</b> |
| <b>LVM</b>   | Age-adjusted  | 125                         | 127                                   | 136                                   | 136                          | <0.0001         |
|              | MV-adjusted   | 129                         | 125                                   | 129                                   | 131                          | 0.16            |
| <b>LVEDV</b> | Age-adjusted  | 146                         | 144                                   | 140                                   | 151                          | 0.11            |
|              | MV-adjusted   | 149                         | 143                                   | 136                                   | 148                          | 0.001           |
| <b>Women</b> |               |                             |                                       |                                       |                              |                 |
|              | <b>Models</b> | <b>Normal<br/>(n = 533)</b> | <b>High<br/>FPG/FPI<br/>(n = 207)</b> | <b>Pre-<br/>Diabetes<br/>(n = 84)</b> | <b>Diabetes<br/>(n = 54)</b> | <b>p-value*</b> |
| <b>LVM</b>   | Age-adjusted  | 83                          | 88                                    | 95                                    | 93                           | <0.0001         |
|              | MV-adjusted   | 86                          | 85                                    | 86                                    | 86                           | 0.96            |
| <b>LVEDV</b> | Age-adjusted  | 106                         | 111                                   | 114                                   | 113                          | 0.0002          |
|              | MV-adjusted   | 109                         | 109                                   | 107                                   | 107                          | 0.75            |

Cells present adjusted mean values of cardiac measures; \*p-value for trend.

MV-adjusted = multivariable-adjusted; LVM = left ventricular mass; LVEDV = left ventricular end-diastolic volume. “Normal” group includes participants with both fasting plasma glucose  $\leq$  100mg/dl and fasting plasma insulin  $\leq$  75<sup>th</sup> percentile of distribution; “High FPG/FPI” group includes those with either fasting plasma insulin  $>$  75<sup>th</sup> percentile of distribution or fasting plasma glucose  $>$  100mg/dl (but not both); and “pre-diabetes” includes those without diabetes but with both fasting plasma glucose  $>$  100mg/dl and fasting plasma insulin  $>$  75<sup>th</sup> percentile of distribution.

MV model adjusted for age, body mass index, systolic blood pressure, cardioactive drug therapy and smoking status.
